# Supplementary material for: Boosted Li2CO3 reversible conversion utilizing Cu-doped TiB MBene/graphene for Li–CO2 batteries
Source: Royal Society of Chemistry journal article supplement (doi:10.1039/d4ta05343e), 2024-01-01
Supplement: d4ta05343e1.pdf [file d4ta05343e1.pdf]

1 **Supporting Information**

2

3 **Boosted Li<sub>2</sub>CO<sub>3</sub> reversible conversion utilizing Cu-doped TiB MBene/graphene for Li-CO<sub>2</sub>**  
4 **batteries**

5 Tingting Luo<sup>a</sup>, Qiong Peng<sup>a,\*</sup>, Mengmeng Yang<sup>a</sup>, Haojie Hu<sup>a</sup>, Junfei Ding<sup>a</sup>, Yanli Chen<sup>a</sup>, Xiu Gong<sup>a</sup>,  
6 Jingliang Yang<sup>a</sup>, Yunpeng Qu<sup>a</sup>, Zeyou Zhou<sup>b</sup>, Xiaosi Qi<sup>a,\*</sup> and Zhimei Sun<sup>c,\*</sup>

7 <sup>a</sup>*College of Physics, Guizhou University, Guiyang 550025, China*

8 <sup>b</sup>*State Grid Fujian Electric Power Research Institute, Fuzhou 350007, China*

9 <sup>c</sup>*School of Materials Science and Engineering, Beihang University, Beijing 100191, China*

10 \*E-mails: qpeng@gzu.edu.cn (Q. P.), xsqi@gzu.edu.cn (X. Q.), zmsun@buaa.edu.cn (Z. S.)

11

12 **Table of Contents**

13 S1. Transition metals-doped TiB MBene/graphene heterostructure.....S1

14 S2. Reaction mechanisms in Li-CO<sub>2</sub> batteries.....S5

15 S2.1. Nucleation mechanism of Li<sub>2</sub>C<sub>2</sub>O<sub>4</sub> and Li<sub>2</sub>CO<sub>3</sub>.....S5

16 S2.2. Decomposition mechanism of Li<sub>2</sub>CO<sub>3</sub>.....S6

17 S2.3. Bifunctionality of target catalysts for 4e<sup>-</sup> Li-CO<sub>2</sub> redox.....S8

18 S2.4. Strain response.....S13

19 S3. Stability of TiB/G in ethylene carbonate solvents.....S16

20 S4. Constant potential solvent effects.....S16

21 References.....S21

22

23 **S1. Transition metals-doped TiB MBene/graphene heterostructure**

24

25 **Table S1.** Optimized energy  $E$  (eV), lattice constants  $a$  and  $b$  (Å) of TiB and graphene supercells, the  
 26 interlayer distance  $d$  (Å) and maximum lattice mismatch of TiB/graphene heterostructure.

| Species      | $E$      | $a$   | $b$   | $d$   | Maximum lattice mismatch |
|--------------|----------|-------|-------|-------|--------------------------|
| TiB          | -273.577 | 8.851 | 9.454 | -     | -                        |
| Graphene     | -296.174 | 8.554 | 9.866 | -     | -                        |
| TiB/graphene | -575.950 | 8.734 | 9.750 | 2.230 | 4.18%                    |

27

28 **Table S2.** The d-band center ( $\epsilon_d$ , eV), Bader charge transfer, electronegativity, number of d-electrons  
 29 and formation energy ( $E_f$ , eV) of 3d transition metals (TM = Mn, Fe, Co, Ni, Cu) anchored on the  
 30 defective TiB/G plane.

| 3d metal | $\epsilon_d$ | Bader charge | Electronegativity | Number of d-electrons | $E_f$ |
|----------|--------------|--------------|-------------------|-----------------------|-------|
| Mn       | -2.631       | -0.613       | 1.550             | 5                     | -2.28 |
| Fe       | -2.459       | -0.321       | 1.830             | 6                     | -2.05 |
| Co       | -2.599       | -0.100       | 1.910             | 7                     | -1.97 |
| Ni       | -2.596       | 0.080        | 1.880             | 8                     | -1.97 |
| Cu       | -2.784       | -0.087       | 1.900             | 10                    | -1.26 |

31

32

33 **Table S3.** U-J values used during the DFT+U calculations, cohesive energy of 3d transition metals  
 34 (TM = Ti, Mn, Fe, Co, Ni, Cu), binding energy ( $E_b$ , eV) relative to an isolated metal, the number of  
 35 electrons ( $N_e$ ) transferred during the dissolution, standard electrode potential ( $U_{\text{diss}}^0$ , V vs. SHE) and  
 36 computed dissolution potential ( $U_{\text{diss}}$ , V vs. SHE).

| 3d metal            | Ti    | Mn     | Fe    | Co    | Ni    | Cu    |
|---------------------|-------|--------|-------|-------|-------|-------|
| U-J                 | 2.58  | 3.06   | 3.29  | 3.42  | 3.40  | 3.87  |
| $E_{\text{coh}}$    | -5.83 | -4.11  | -5.16 | -5.61 | -5.54 | -3.99 |
| $E_b$               | -9.11 | -6.39  | -7.21 | -7.58 | -7.50 | -5.25 |
| $N_e$               | 3     | 2      | 2     | 2     | 2     | 2     |
| $U_{\text{diss}}^0$ | -1.37 | -1.185 | -0.44 | -0.28 | -0.25 | +0.34 |
| $U_{\text{diss}}$   | 1.67  | 2.01   | 3.16  | 3.51  | 3.5   | 2.97  |

37

38 The cohesive energy was calculated using:

$$39 \quad E_{\text{coh}} = E_{\text{TM}}^{\text{bulk}} / m - E_{\text{TM}}^{\text{isolated}} \quad (\text{S1})$$

40 where  $m$  represents the atomic number in the bulk metal. In comparison to cohesive energy, the more  
 41 negative binding energy suggests that the anchored metal atom exhibits remarkable stability, rendering  
 42 it challenging to aggregate into clusters on the TM/Ti<sub>17</sub>B<sub>18</sub>/G surfaces.

43

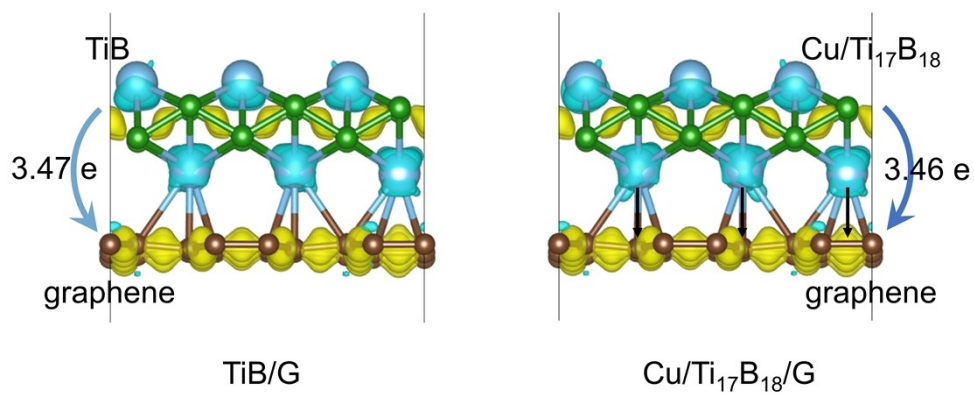

48 **S2. Reaction mechanisms in Li-CO<sub>2</sub> batteries**

49 **S2.1. Nucleation mechanism of Li<sub>2</sub>C<sub>2</sub>O<sub>4</sub> and Li<sub>2</sub>CO<sub>3</sub>**

50

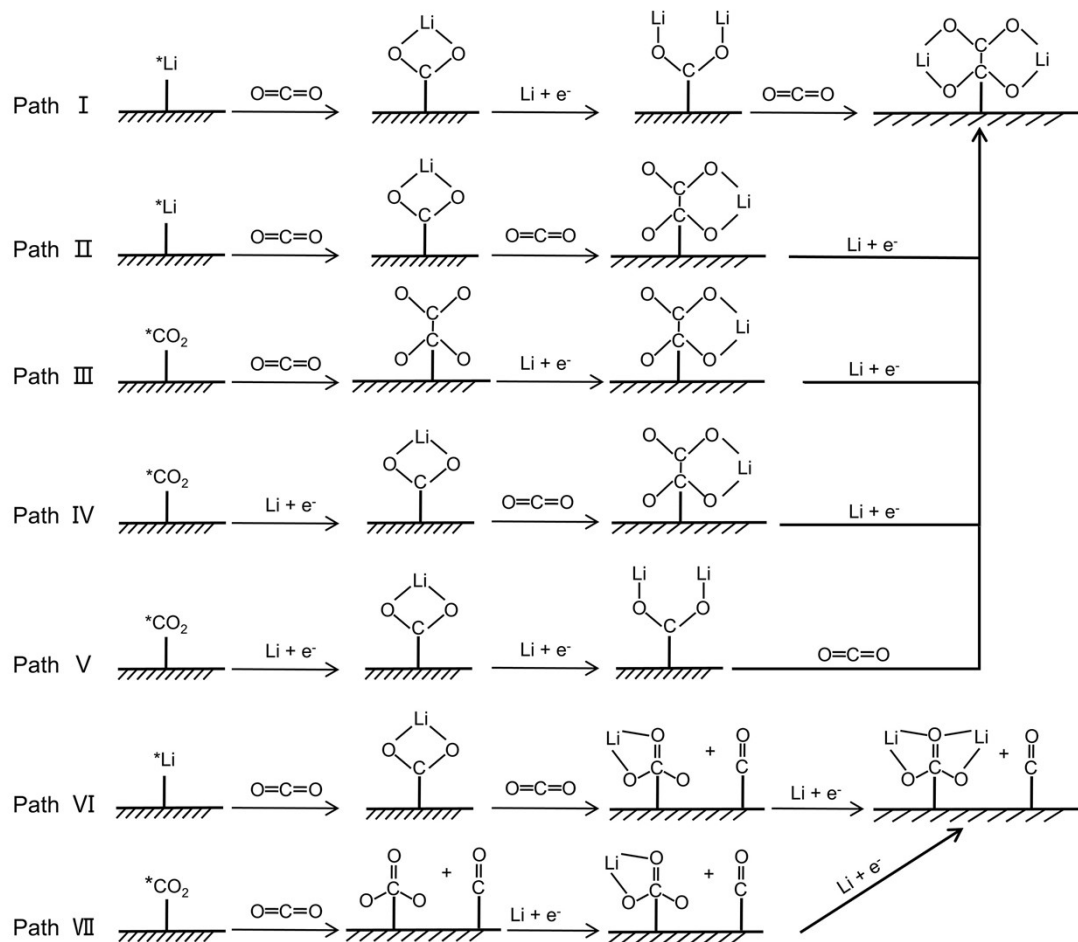

51

52 **Fig. S2.** Nucleation mechanism of Li<sub>2</sub>C<sub>2</sub>O<sub>4</sub> and Li<sub>2</sub>CO<sub>3</sub> during the initial 2e<sup>-</sup> step of the discharging

53 process in Li-CO<sub>2</sub> batteries.

54

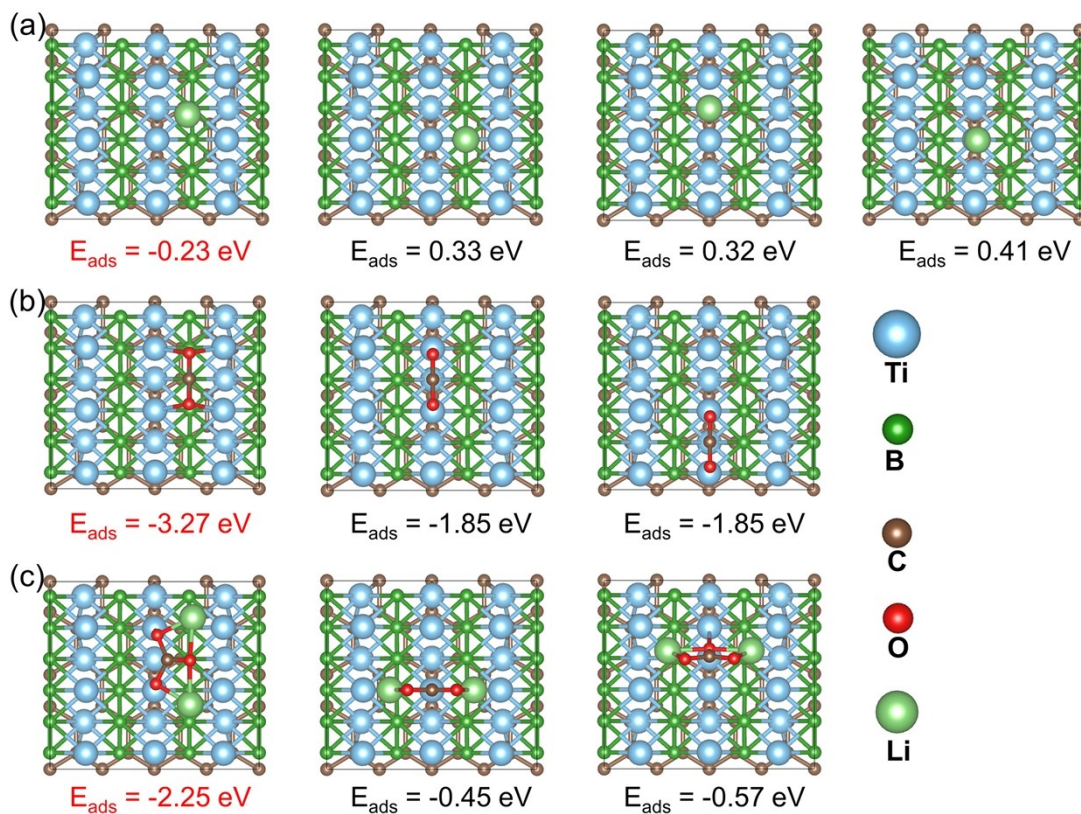

55

56 **Fig. S3.** Diverse configurations of Li, CO<sub>2</sub> and Li<sub>2</sub>CO<sub>3</sub> adsorption on the TiB/G surface, and  
 57 corresponding adsorption energy  $E_{\text{ads}}$ .

58

## 59 S2.2. Decomposition mechanism of Li<sub>2</sub>CO<sub>3</sub>

60 To explore the reversible ability of discharge product dissociation during charging, we examined  
 61 the Li<sub>2</sub>CO<sub>3</sub> dissociation energy barrier and whether amorphous carbon participated in this reaction  
 62 based on two possible reaction pathways.

63 1) The self-decomposition of Li<sub>2</sub>CO<sub>3</sub> evolution CO<sub>2</sub>, Li<sup>+</sup> and O<sub>2</sub>:

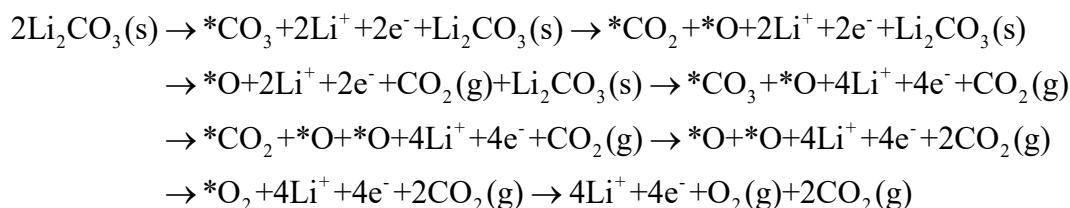

65

66 2) The co-decomposition of  $\text{Li}_2\text{CO}_3$  and C to evolution  $\text{CO}_2$  and  $\text{Li}^+$ :

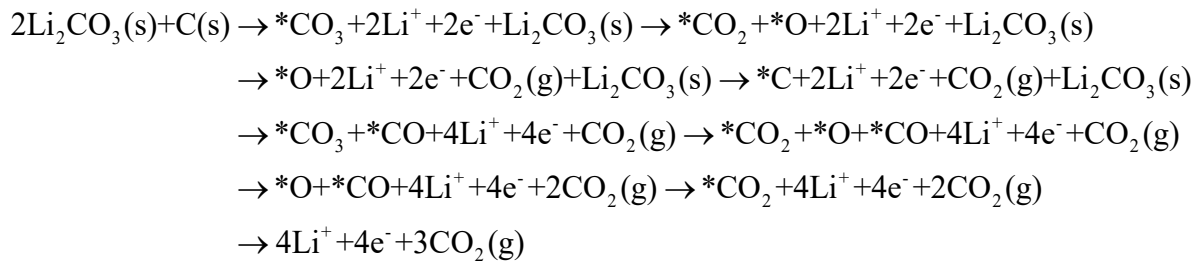

68

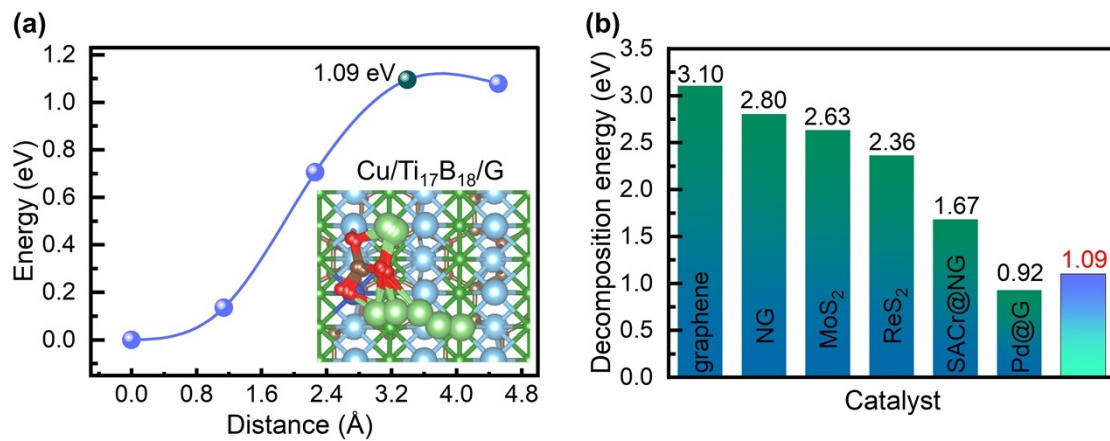

69

70 **Fig. S4.** (a) Dissociation energy barrier for  $\text{Li}_2\text{CO}_3$  on  $\text{Cu}/\text{Ti}_{17}\text{B}_{18}/\text{G}$  and (b) comparison with previous

71 studies.<sup>1,2</sup>

72

73 **S2.3. Bifunctionality of target catalysts for 4e<sup>-</sup> Li-CO<sub>2</sub> redox**

74 Aiming at revealing the bifunctional catalytic potential of TM/Ti<sub>17</sub>B<sub>18</sub>/G in facilitating CO<sub>2</sub>  
 75 reduction/evolution reactions (CO<sub>2</sub>RR/CO<sub>2</sub>ER), a continuous four-electron transfer mechanism was  
 76 utilized, accompanied by the adsorption of three CO<sub>2</sub> and four Li<sup>+</sup>, where \* represents the catalyst:

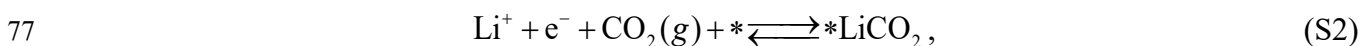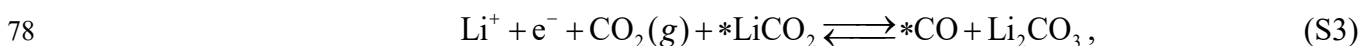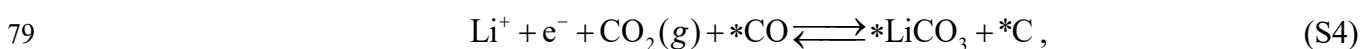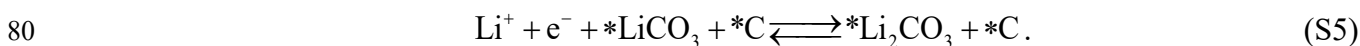

81 For free Li, CO<sub>2</sub>, Li<sub>2</sub>CO<sub>3</sub>, CO and O<sub>2</sub> molecules, their respective DFT energy *E* (eV) and chemical  
 82 potential *μ* (V) are summarized in **Table S4**. It is worth noting that for the same reaction intermediates,  
 83 the zero-point energy ( $\Delta E_{\text{ZPE}}$ ) and entropy (*S*) values take the same value, as they exhibit rather close  
 84 value even across different TM/Ti<sub>17</sub>B<sub>18</sub>/G catalysts. These findings are based on our recent study,<sup>3</sup> as  
 85 displayed in **Table S5**.

86

87 **Table S4.** DFT energy *E* (eV) and chemical potential *μ* (V) of Li, CO<sub>2</sub>, Li<sub>2</sub>CO<sub>3</sub>, CO and O<sub>2</sub>.

| Species                         | <i>E</i> | <i>μ</i> |
|---------------------------------|----------|----------|
| Li                              | -        | -1.99    |
| CO <sub>2</sub>                 | -22.96   | -23.12   |
| Li <sub>2</sub> CO <sub>3</sub> | -37.21   | -40.01   |
| CO                              | -14.77   | -15.25   |
| O <sub>2</sub>                  | -9.86    | -9.94    |

88



89 **Table S5.** The used zero-point energy ( $\Delta E_{ZPE}$ ), entropy ( $S$ ), and entropy contribution ( $T\Delta S$  at T =  
90 298.15 K) for  $^*\text{LiCO}_2$ ,  $^*\text{CO}$ ,  $^*\text{LiCO}_3+^*\text{C}$ ,  $^*\text{Li}_2\text{CO}_3+^*\text{C}$  intermediates.

| Intermediates                         | $E_{ZPE}$ (eV) | $S$ (eV/K) | $T\Delta S$ (eV) |
|---------------------------------------|----------------|------------|------------------|
| $^*\text{LiCO}_2$                     | 0.3404         | 0.0007     | 0.1946           |
| $^*\text{CO}$                         | 0.1812         | 0.0004     | 0.1254           |
| $^*\text{LiCO}_3+^*\text{C}$          | 0.5830         | 0.0010     | 0.3000           |
| $^*\text{Li}_2\text{CO}_3+^*\text{C}$ | 0.6508         | 0.0012     | 0.3543           |

91

92 **Table S6.** DFT total energy ( $E_{\text{DFT}}$ ) and adsorption free energy ( $\Delta G$ ) of reaction intermediates.

| Catalysts                              | Intermediates                        | $E_{\text{DFT}}$ (eV) | $\Delta G$ (eV) |
|----------------------------------------|--------------------------------------|-----------------------|-----------------|
| TiB/G                                  | *                                    | -575.96               | 0.00            |
|                                        | *LiCO <sub>2</sub>                   | -604.70               | 3.50            |
|                                        | *CO                                  | -592.69               | 2.96            |
|                                        | *LiCO <sub>3</sub> +*C               | -619.91               | 1.91            |
|                                        | *Li <sub>2</sub> CO <sub>3</sub> +*C | -626.26               | 4.34            |
| Mn/Ti <sub>17</sub> B <sub>18</sub> /G | *                                    | -576.00               | 0.00            |
|                                        | *LiCO <sub>2</sub>                   | -604.08               | 2.83            |
|                                        | *CO                                  | -592.20               | 3.09            |
|                                        | *LiCO <sub>3</sub> +*C               | -620.31               | 2.79            |
|                                        | *Li <sub>2</sub> CO <sub>3</sub> +*C | -626.02               | 3.71            |
| Fe/Ti <sub>17</sub> B <sub>18</sub> /G | *                                    | -575.09               | 0.00            |
|                                        | *LiCO <sub>2</sub>                   | -603.07               | 2.73            |
|                                        | *CO                                  | -591.25               | 3.15            |
|                                        | *LiCO <sub>3</sub> +*C               | -619.52               | 2.96            |
|                                        | *Li <sub>2</sub> CO <sub>3</sub> +*C | -625.00               | 3.48            |
| Co/Ti <sub>17</sub> B <sub>18</sub> /G | *                                    | -573.84               | 0.00            |
|                                        | *LiCO <sub>2</sub>                   | -602.49               | 3.41            |
|                                        | *CO                                  | -589.94               | 2.42            |
|                                        | *LiCO <sub>3</sub> +*C               | -618.33               | 3.07            |
|                                        | *Li <sub>2</sub> CO <sub>3</sub> +*C | -623.64               | 3.31            |
| Ni/Ti <sub>17</sub> B <sub>18</sub> /G | *                                    | -572.33               | 0.00            |
|                                        | *LiCO <sub>2</sub>                   | -600.94               | 3.36            |
|                                        | *CO                                  | -588.49               | 2.52            |
|                                        | *LiCO <sub>3</sub> +*C               | -616.81               | 3.00            |
|                                        | *Li <sub>2</sub> CO <sub>3</sub> +*C | -621.96               | 3.15            |
| Cu/Ti <sub>17</sub> B <sub>18</sub> /G | *                                    | -570                  | 0.00            |
|                                        | *LiCO <sub>2</sub>                   | -598.51               | 3.27            |
|                                        | *CO                                  | -586.15               | 2.60            |
|                                        | *LiCO <sub>3</sub> +*C               | -614.40               | 2.94            |
|                                        | *Li <sub>2</sub> CO <sub>3</sub> +*C | -619.52               | 3.11            |

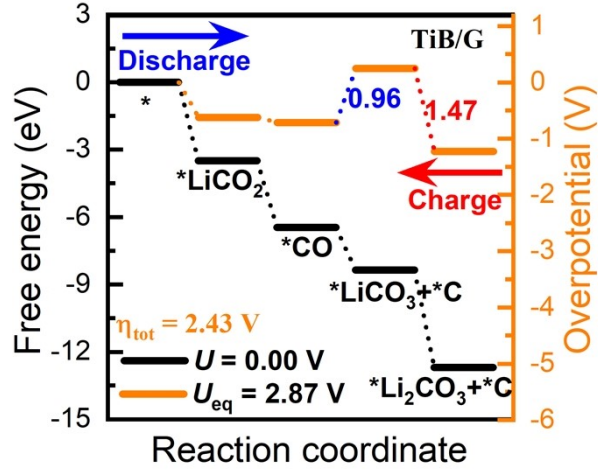

94

95 **Fig. S5.** Continuous four-electron transfer free energy profiles on TiB/G.

96

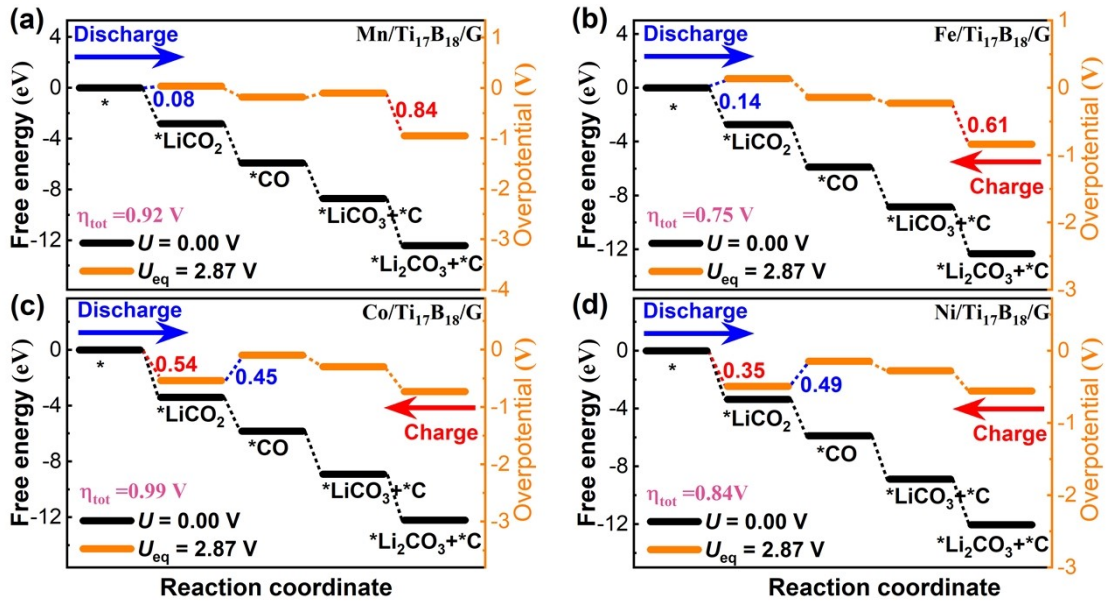

97

98 **Fig. S6.** Continuous four-electron transfer free energy profiles on TM/Ti<sub>17</sub>B<sub>18</sub>/G (TM = Mn, Fe, Co,

99 Ni).

100

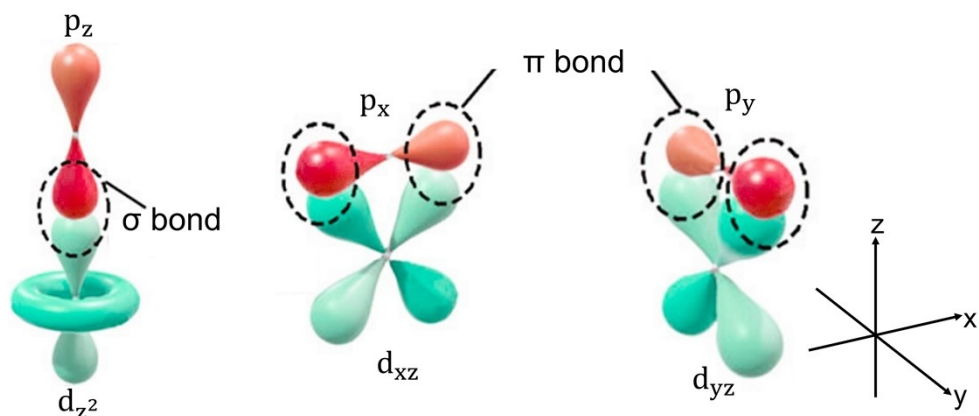

101

102 **Fig. S7.** Three possible ways of p-d orbital hybridization to form one  $\sigma$  bond and two  $\pi$  bonds.

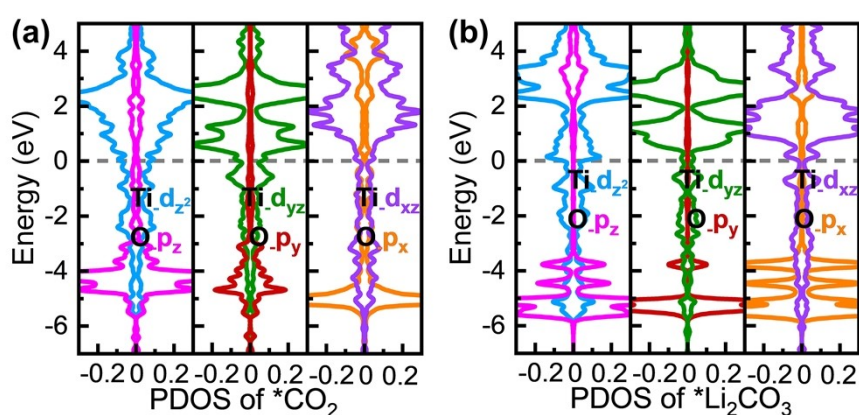

103

104 **Fig. S8.** Projected density of states (PDOS) for the adsorption of (a)  $\text{CO}_2$  and (b)  $\text{Li}_2\text{CO}_3$  on TiB/G,

105 with positive PDOS values representing the spin-up channel and negative PDOS values representing

106 the spin-down channel.

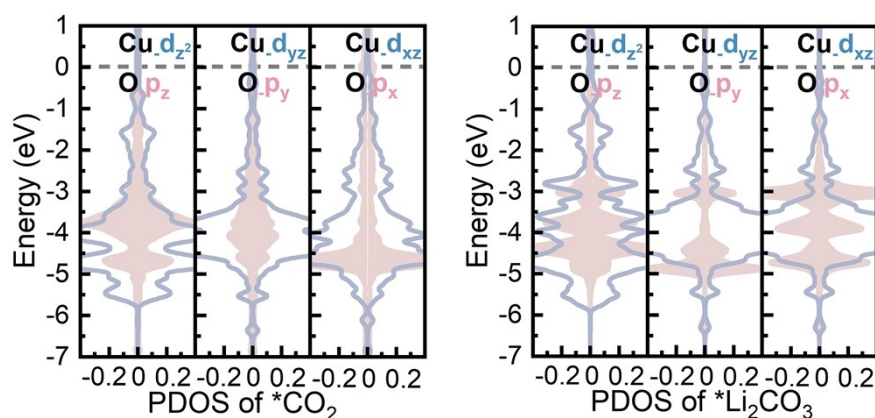

107

108 **Fig. S9.** The  $d_{z^2}$ - $p_z$ ,  $d_{yz}$ - $p_y$  and  $d_{xz}$ - $p_x$  orbital interactions for  $\text{CO}_2$  and  $\text{Li}_2\text{CO}_3$  adsorption on Cu-doped

109 TiB/G.

110 **S2.4. Strain response**

111 **Table S7.** The ultimate tensile strains and Young's modulus (N/m) of TiB/G and Cu/Ti<sub>17</sub>B<sub>18</sub>/G under  
 112 x- and y-direction strain.

| Direction | TiB/G                    |                 | Cu/Ti <sub>17</sub> B <sub>18</sub> /G |                 |
|-----------|--------------------------|-----------------|----------------------------------------|-----------------|
|           | Ultimate tensile strains | Young's modulus | Ultimate tensile strains               | Young's modulus |
| x         | 22%                      | 431.6           | 26%                                    | 432.4           |
| y         | 22%                      | 562.5           | 22%                                    | 551.4           |

113

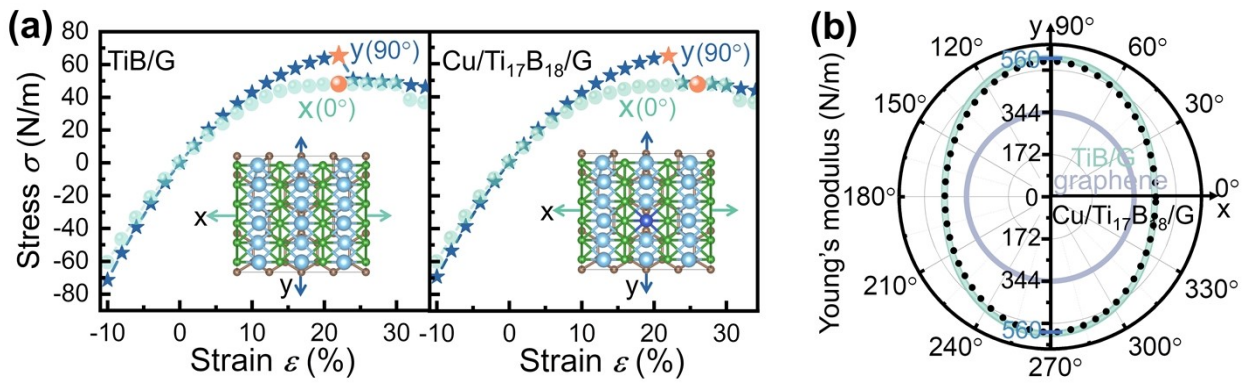

114

115 **Fig. S10.** (a) Uniaxial stress-strain curves for TiB/G and Cu/Ti<sub>17</sub>B<sub>18</sub>/G, (b) Young's modulus of TiB/G,  
 116 Cu/Ti<sub>17</sub>B<sub>18</sub>/G and graphene.

117

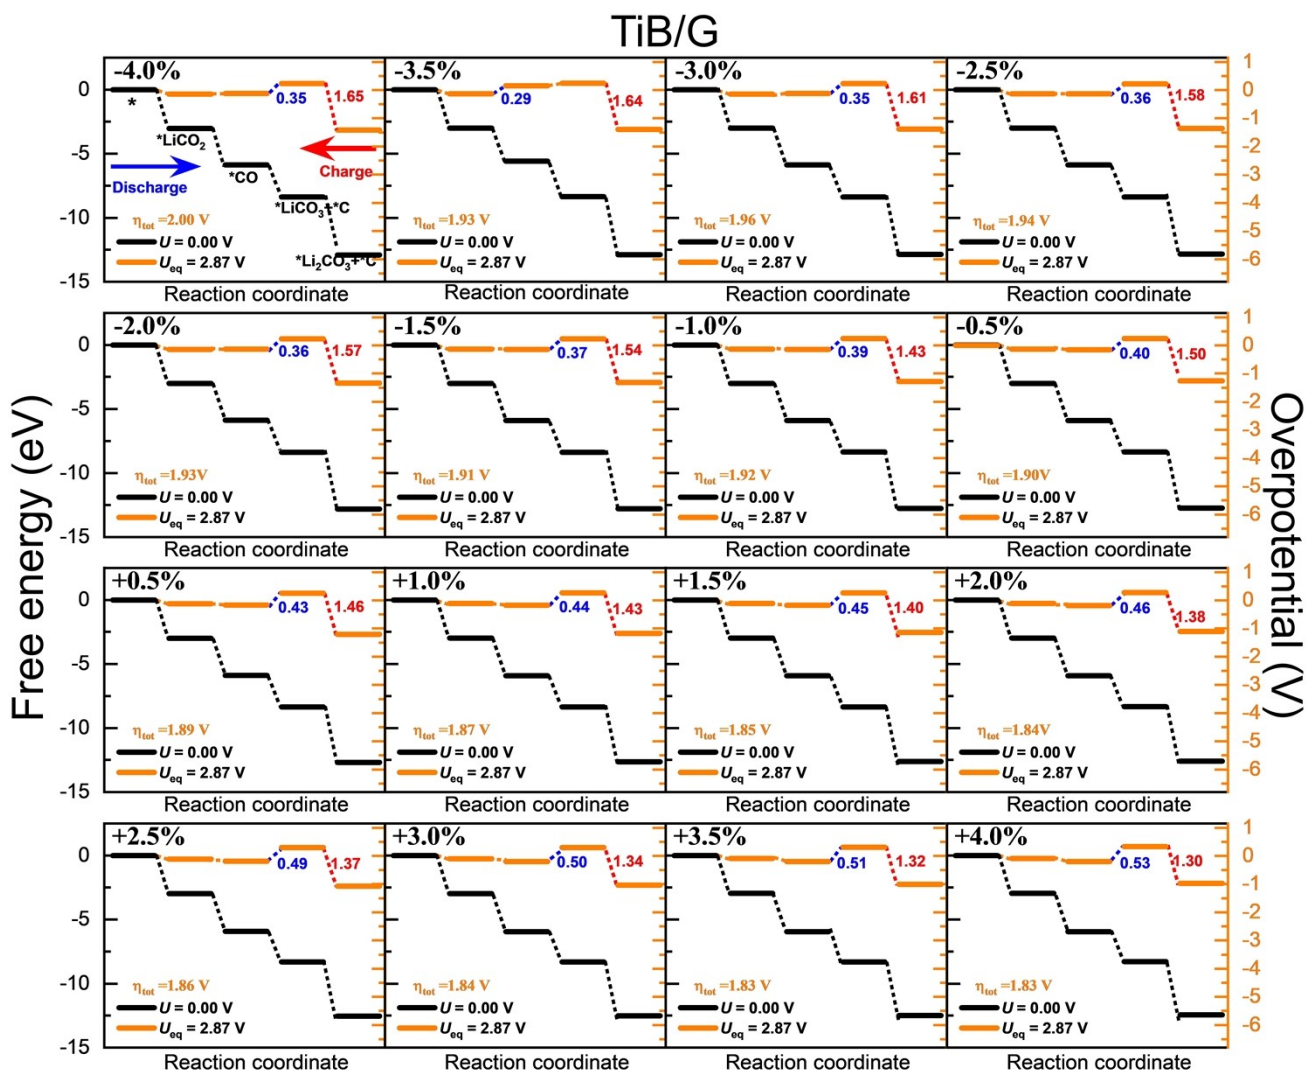

118

119 **Fig. S11.** Free energy profiles of TiB/G under x-direction strain with a magnitude from -4% to +4%,  
 120 where blue and red numbers represent CO<sub>2</sub>RR overpotential ( $\eta_{\text{CO}_2\text{RR}}$ ) during discharge and CO<sub>2</sub>ER  
 121 overpotential ( $\eta_{\text{CO}_2\text{ER}}$ ) during charge, respectively, and  $\eta_{\text{tot}}$  represents the total overpotential.

122





### 128 S3. Stability of TiB/G in ethylene carbonate solvents

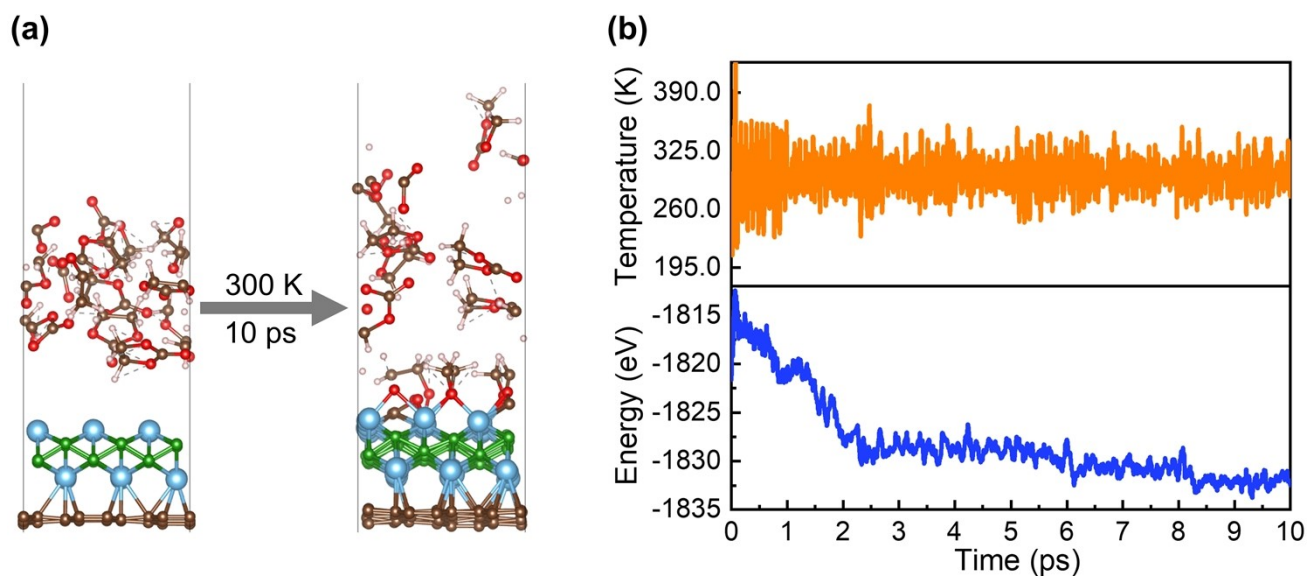

129

130 **Fig. S13.** (a) Structural changes of TiB/G in explicit ethylene carbonate (EC) solvent. (b)

131 Corresponding energy and temperature variations during AIMD simulations over 10 ps at 300 K.

132

### 133 S4. Constant potential solvent effects

134 To provide a more solid reference to the experiments, the constant potential implicit solvent  
135 model<sup>4, 5</sup> is employed to investigate the catalytic selectivity and bifunctional activity of pristine and  
136 Cu-doped TiB/G catalysts. The tetraethylene glycol dimethyl ether (TEGDME) with a dielectric  
137 permittivity of 7.79 was chosen as the aprotic solvent for Li-CO<sub>2</sub> batteries.<sup>6</sup> The constant potential  
138 implicit solvent calculations were performed by using the VASPsol code. Within this framework, the  
139 surface tension was set to 0 due to the minimal variation in cavity shape. Additionally, we optimized  
140 the cutoff charge density through rigorous testing, depicted in **Fig. S14**, and determined a value of  
141 0.00025 Å<sup>-3</sup>. The Debye length was adjusted to 3 Å, while the remaining parameters were maintained  
142 at their default settings. Our examination of the ion charge density of TiB/G in **Fig. S15**, devoid of  
143 voids or breaks, further validates the rationale of the selected parameters.



144 The constant potential method (CPM) within implicit solvent models was used to simulate  
 145 realistic electrochemical conditions using VASPsol code.<sup>7-9</sup> The potential-dependent energy ( $E_U$ ) and  
 146 electrode potential ( $U_q$ ) were defined as:

$$147 \quad E_U = E_{\text{DFT}} - E_{\text{Fermi}} \times \Delta q, \quad (\text{S6})$$

$$148 \quad U_q (\text{V vs. Li}^+ / \text{Li}) = -1.39 - (E_{\text{Fermi}} + E_{\text{Fermi-shift}}) / e, \quad (\text{S7})$$

149 where  $-1.39$  V is the absolute electrode potential of Li redox ( $\text{Li}^+ + e^- \rightleftharpoons \text{Li}$ ) vs. vacuum potential  
 150 level.<sup>10</sup>  $E_{\text{DFT}}$ ,  $E_{\text{Fermi}}$ , and  $E_{\text{Fermi-shift}}$  are the DFT energy, Fermi energy, and Fermi energy shift at various  
 151 electrode potentials. The number of added or removed electrons ( $\Delta q$ ) ranges from  $-2.0$  e to  $2.0$  e in  
 152 steps of  $0.2$  e. Principally, the relationship between  $E_U$  and  $U_q$  follows a quadratic function based on  
 153 the double electrical layer theory, as described below,<sup>10, 11</sup>

$$154 \quad E_U = -\frac{1}{2}C(U_q - U_{\text{PZC}})^2 + E_{\text{PZC}}. \quad (\text{S8})$$

155 where  $C$ ,  $U_{\text{PZC}}$ , and  $E_{\text{PZC}}$  are the fitted values for capacitance, potential of zero charge (PZC), and  
 156 system energy at PZC, respectively.

157 As evidenced in **Fig. S16a**, TiB/G and Cu/Ti<sub>17</sub>B<sub>18</sub>/G still exhibit exceptional selectivity for  
 158 Li<sub>2</sub>CO<sub>3</sub> nucleation over Li<sub>2</sub>C<sub>2</sub>O<sub>4</sub> under varying electrode potentials. The potential-dependent energy is  
 159 aptly represented by a quadratic parabolic relationship (**Fig. S16b**), where the detailed parameters of  
 160 these quadratic functions are given in **Tables S8-S9**. It is seen that the adsorption free energies of  
 161 intermediates such as \*LiCO<sub>2</sub>, \*CO, \*LiCO<sub>3</sub> + \*C, and \*Li<sub>2</sub>CO<sub>3</sub> + \*C display varying degrees of  
 162 correlation with the increased electrode potential (**Fig. S16c**). Intriguingly, the Cu-doped TiB/G retains  
 163 a lower limiting potential compared to the pristine TiB/G counterpart. The CO<sub>2</sub>RR/CO<sub>2</sub>ER  
 164 overpotential in Cu/Ti<sub>17</sub>B<sub>18</sub>/G undergoes a notable reduction, from an initial  $2.94$  V to  $2.13$  V at the  
 165 equilibrium potential (**Fig. S16d**), which is comparable to that of pyridine-N and pyrrole-N co-doped

166 graphene (experimental voltage gap of 2.13 V at 1200 mA g<sup>-1</sup>).<sup>2</sup> These constant potential results  
167 further emphasize the Li-CO<sub>2</sub> redox facilitated by the p-d electron push-pull synergy present in  
168 Cu/Ti<sub>17</sub>B<sub>18</sub>/G catalyst.

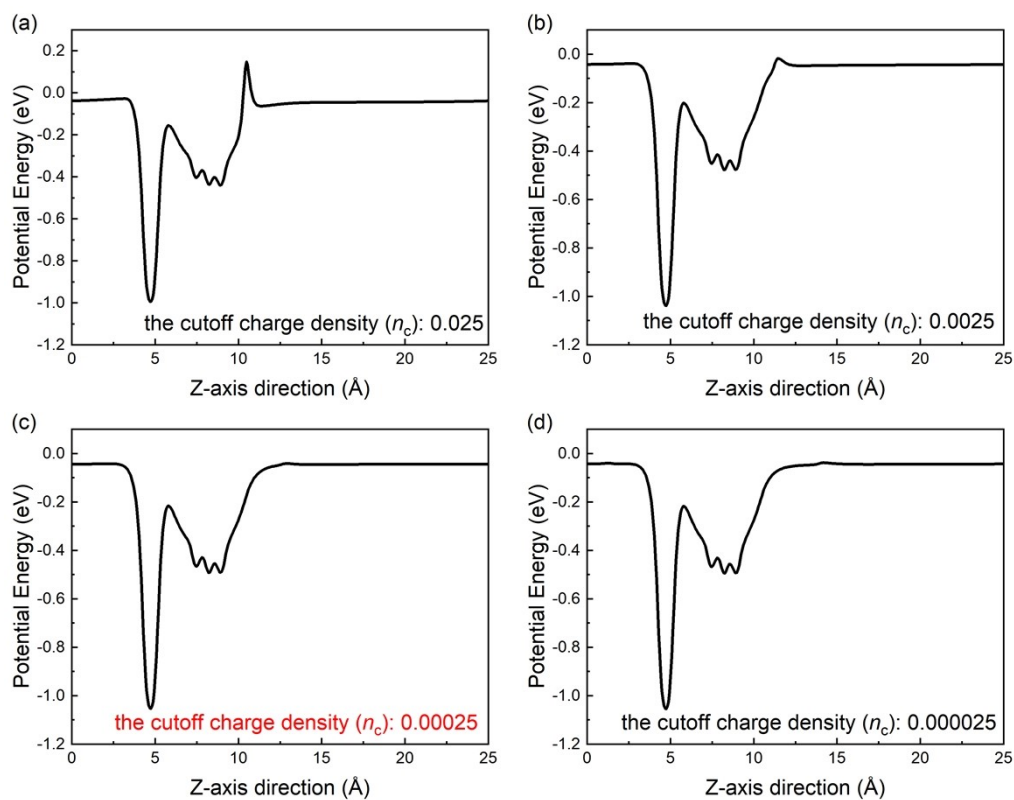

169

170 **Fig. S14.** The cutoff charge density ( $n_c$ ) employed in VASPsol for TiB/G.

171

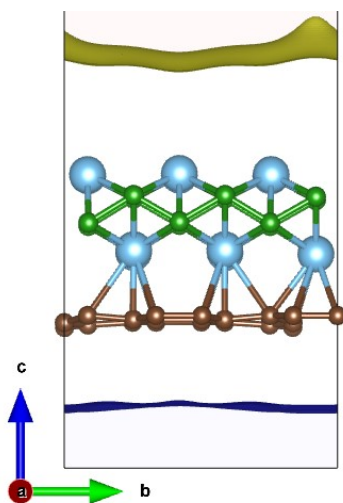

172

173 **Fig. S15.** Ionic charge density for TiB/G, where isosurface was set to  $7.3 \times 10^{-8} \text{ e}/\text{\AA}^{-3}$ .

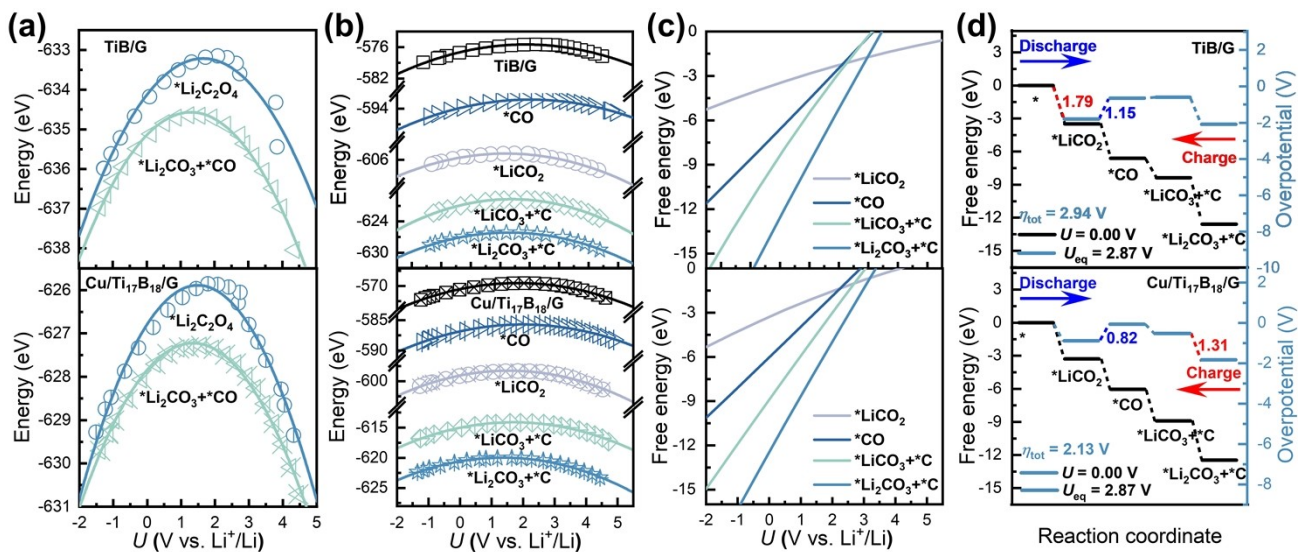

174

175 **Fig. S16.** Constant potential solvation effects. (a) Nucleation selectivity for \*Li<sub>2</sub>C<sub>2</sub>O<sub>4</sub> and \*Li<sub>2</sub>CO<sub>3</sub>  
 176 under diverse electrode potential U vs. Li<sup>+</sup>/Li. (b) Potential-dependent energies and (c) Gibbs free  
 177 energy for intermediate adsorption. (d) Discharge/charge free energy profiles at 0 V and at equilibrium  
 178 potential 2.87 V.

179

180 **Table S8.** For pristine TiB/G with/without intermediate adsorption, the fitted parameters of potential-  
 181 dependent energy ( $E = I + b_1 \times U + b_2 \times U^2$ ), potential of zero charge  $U_{PZC}$  (V vs.  $Li^+/Li$ ), capacitance  
 182  $C_1$  (e/V), and surface area normalized capacitance  $C_2$  ( $\mu F/cm^2$ ), system energy at potential of zero  
 183 charge ( $E_{PZC}$ , eV).

| Species                              | I        | $b_1$ | $b_2$  | $C_1$ (e/V) | $C_2$ ( $\mu F/cm^2$ ) | $U_{PZC}$ (V) | $E_{PZC}$ (eV) | $R^2$  |
|--------------------------------------|----------|-------|--------|-------------|------------------------|---------------|----------------|--------|
| TiB/G                                | -576.531 | 1.112 | -0.299 | 0.598       | 12.097                 | 2.196         | -575.498       | 0.9859 |
| *LiCO <sub>2</sub>                   | -605.252 | 0.767 | -0.323 | 0.647       | 13.075                 | 1.491         | -604.794       | 0.9969 |
| *CO                                  | -593.413 | 1.149 | -0.285 | 0.570       | 11.523                 | 2.226         | -592.269       | 0.9934 |
| *LiCO <sub>3</sub> +*C               | -620.491 | 1.085 | -0.392 | 0.785       | 15.858                 | 1.901         | -619.833       | 0.9884 |
| *Li <sub>2</sub> CO <sub>3</sub> +*C | -626.700 | 0.870 | -0.335 | 0.671       | 13.558                 | 1.631         | -626.196       | 0.9930 |

184

185 **Table S9.** For Cu/Ti<sub>17</sub>B<sub>18</sub>/G with/without intermediate adsorption, the fitted parameters of potential-  
 186 dependent energy ( $E = I + b_1 \times U + b_2 \times U^2$ ), potential of zero charge  $U_{PZC}$  (V vs.  $Li^+/Li$ ), capacitance  
 187  $C_1$  (e/V), and surface area normalized capacitance  $C_2$  ( $\mu F/cm^2$ ), system energy at potential of zero  
 188 charge ( $E_{PZC}$ , eV).

| Species                                | I        | $b_1$ | $b_2$  | $C_1$ (e/V) | $C_2$ ( $\mu F/cm^2$ ) | $U_{PZC}$ (V) | $E_{PZC}$ (eV) | $R^2$  |
|----------------------------------------|----------|-------|--------|-------------|------------------------|---------------|----------------|--------|
| Cu/Ti <sub>17</sub> B <sub>18</sub> /G | -570.522 | 1.086 | -0.295 | 0.591       | 11.939                 | 2.029         | -569.540       | 0.9923 |
| *LiCO <sub>2</sub>                     | -599.050 | 1.032 | -0.333 | 0.667       | 13.475                 | 1.839         | -598.318       | 0.9874 |
| *CO                                    | -586.830 | 1.147 | -0.288 | 0.577       | 11.660                 | 2.171         | -585.706       | 0.9932 |
| *LiCO <sub>3</sub> +*C                 | -615.012 | 1.069 | -0.317 | 0.634       | 12.806                 | 1.919         | -614.178       | 0.9885 |
| *Li <sub>2</sub> CO <sub>3</sub> +*C   | -620.575 | 0.907 | -0.335 | 0.671       | 13.560                 | 1.644         | -620.009       | 0.9958 |

189

190 **References**

- 191 1. Y. Liu, S. Zhao, D. Wang, B. Chen, Z. Zhang, J. Sheng, X. Zhong, X. Zou, S. P. Jiang, G. Zhou  
192 and H. M. Cheng, *ACS Nano*, 2022, **16**, 1523-1532.
- 193 2. B. Chen, D. Wang, J. Tan, Y. Liu, M. Jiao, B. Liu, N. Zhao, X. Zou, G. Zhou and H.-M. Cheng,  
194 *J. Am. Chem. Soc.*, 2022, **144**, 3106-3116.
- 195 3. P. Shu, Q. Peng, T. Luo, J. Ding, X. Gong, J. Zhou, Y. Yu, X. Qi and Z. Sun, *J. Mater. Chem.*  
196 *A*, 2024, **12**, 6515-6526.
- 197 4. L. Miao, W. Jia, X. Cao and L. Jiao, *Chem. Soc. Rev.*, 2024, **53**, 2771-2807.
- 198 5. X. Hu, S. Chen, L. Chen, Y. Tian, S. Yao, Z. Lu, X. Zhang and Z. Zhou, *J. Am. Chem. Soc.*,  
199 2022, **144**, 18144-18152.
- 200 6. C. Laoire, S. Mukerjee, E. J. Plichta, M. A. Hendrickson and K. M. Abraham, *J. Electrochem.*  
201 *Soc.*, 2011, **158**, A302.
- 202 7. K. Mathew, V. S. C. Kolluru, S. Mula, S. N. Steinmann and R. G. Hennig, *J. Chem. Phys.*, 2019,  
203 **151**, 234101.
- 204 8. S. Ringe, N. G. Hörmann, H. Oberhofer and K. Reuter, *Chem. Rev.*, 2022, **122**, 10777-10820.
- 205 9. N. Lespes and J. S. Filhol, *J. Chem. Theory Comput.*, 2015, **11**, 3375-3382.
- 206 10. Q. Zhang, Y. Zhang, S. Zhang and G. Gao, *J. Phys. Chem. C*, 2023, **127**, 16346-16356.
- 207 11. G. Gao and L. W. Wang, *J. Catal.*, 2020, **391**, 530-538.

208
